# Supplementary material for: Two Functional Classes of Rod Bipolar Cells in the Healthy and Degenerated Optogenetically Treated Murine Retina
Source: Frontiers journal article supplement (doi:10.3389/fncel.2021.809531), 2022-01-13
Supplement: Data_Sheet_1.PDF [file Data_Sheet_1.PDF]

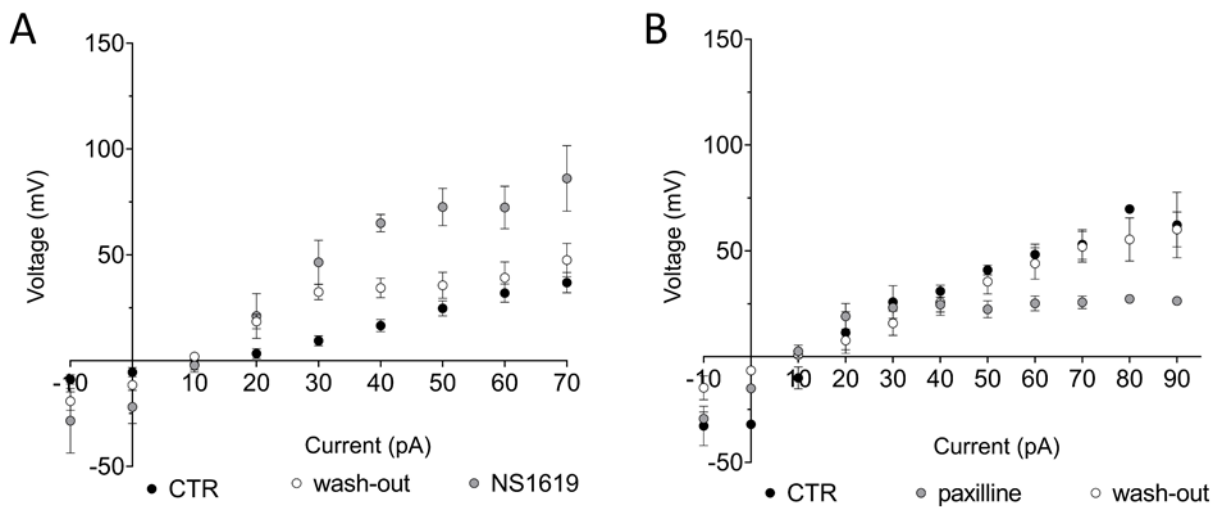

**FIGURE S1 | Wash in and wash out of BK activator (NS1619) and blocker paxilline in *C57BL/6J* retinas.** (A) Average RBC membrane potential in control conditions ( $n=3$ ), with NS1619 ( $30\ \mu\text{M}$ ,  $n=3$ ) and after wash-out of NS1619 ( $n=3$ ). (B) Average RBC membrane potential in control conditions ( $n=3$ ), with paxilline ( $5\ \mu\text{M}$ ,  $n=3$ ) and after wash-out of paxilline ( $n=3$ ). The drugs were applied sequentially.

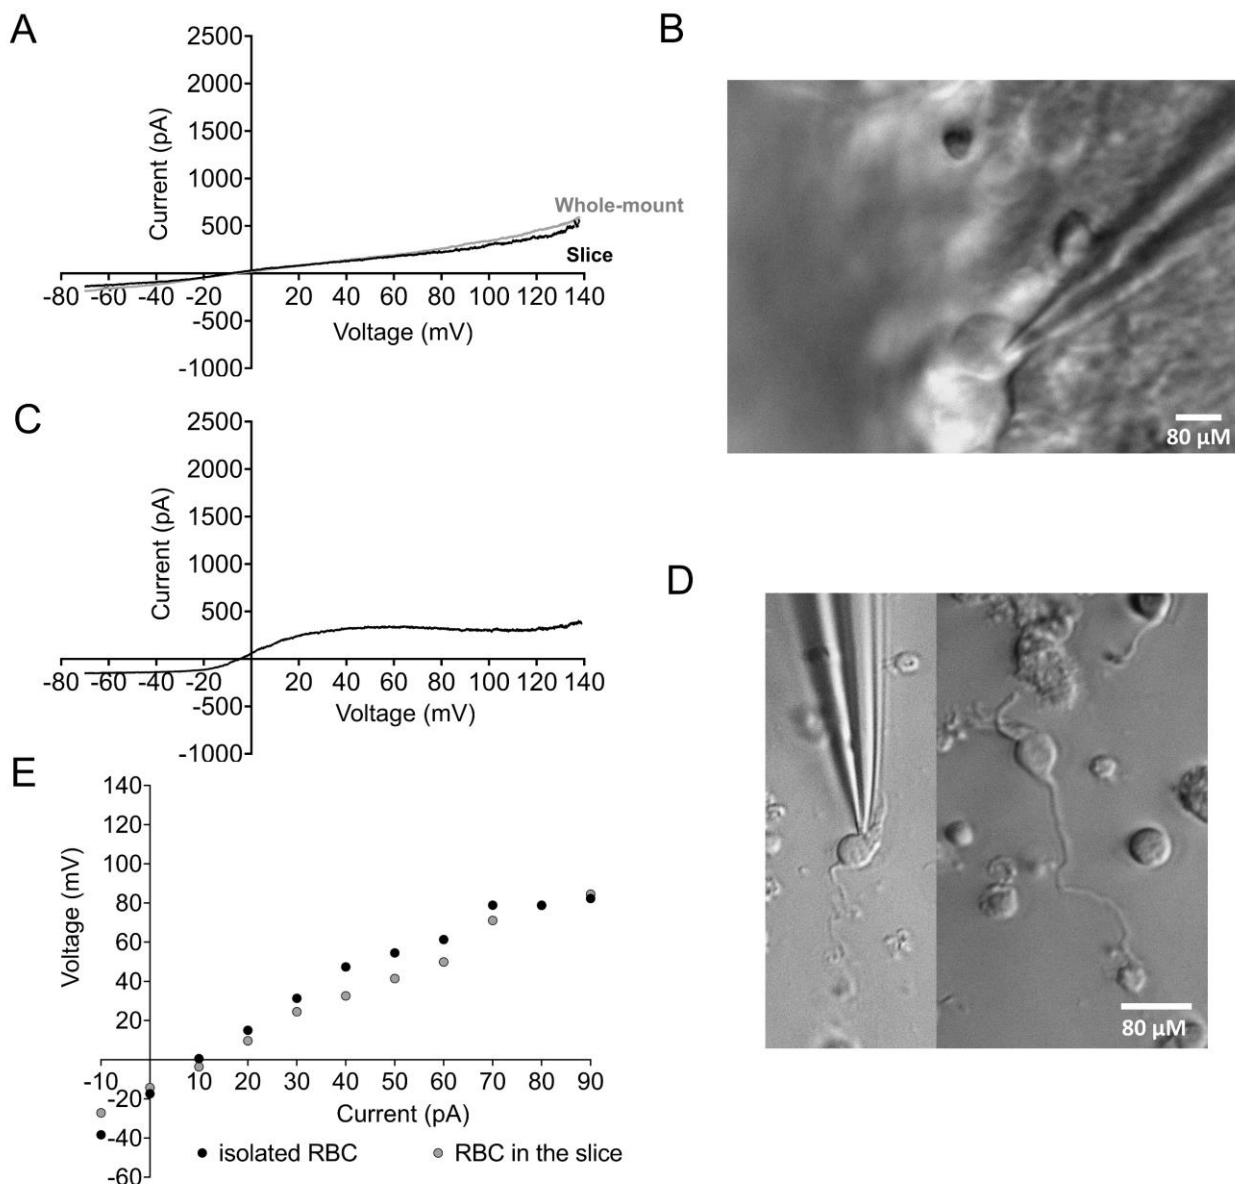

**FIGURE S2 | Passive membrane properties of RBCs are maintained in electrophysiological recordings from different tissue preparations. (A)** Type 2 RBC response recorded from a RBC in a *FVB/NCrl\_Opto-mGluR6* retinal slice. **(B)** DIC image of the patched RBC in (A). **(C)** type 1 RBC response from isolated RBC from a *C57BL/6J* mouse retina. **(D)** Infrared image of isolated RBC taken on a Nikon Eclipse E600FN (40x, NA 0.80). **(E)** Voltage-current relationship recorded in an isolated RBC compared to a recording from a RBC in a retinal slice.

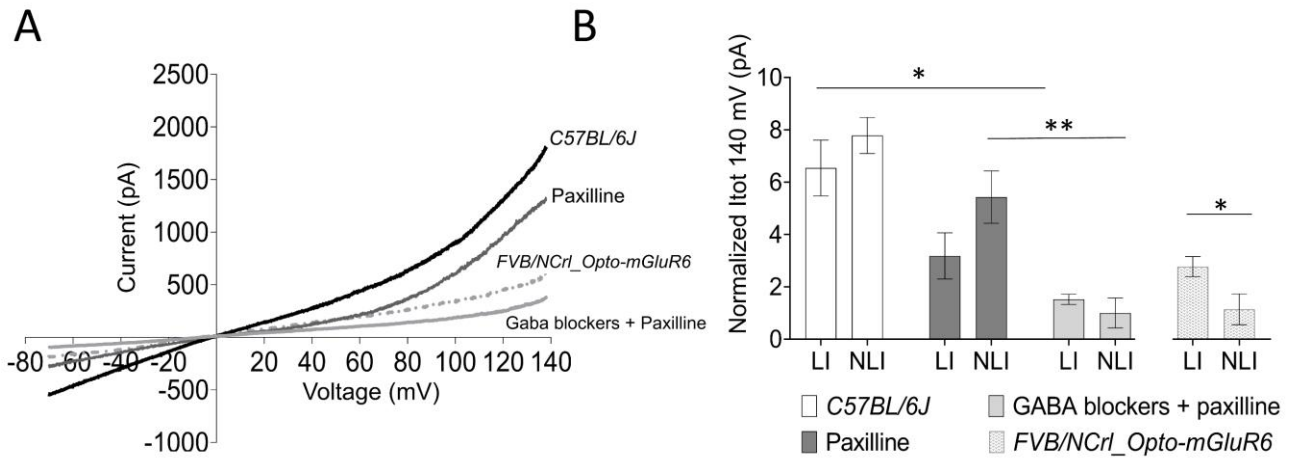

**FIGURE S3 | Influence of BK channel (paxilline) and GABA channel blockers on the RBC conductivity.** (A) I/V relationship of type 2 RBCs in the *C57BL/6J* retina ( $n = 11$ ) with pharmacological block of BK channels alone (paxilline  $5 \mu\text{M}$ ,  $n = 6$ ) and in combination with GABA blockers (TPMPA  $50 \mu\text{M}$ ; SR-95531  $10 \mu\text{M}$ ,  $n = 4$ ) compared to type 2 RBC currents in the *FVB/NCrl\_Opto-mGluR6* retina. The type 2 RBC current in the *rdl* retina resembles a type 2 RBC current in a healthy retina lacking BK channels and GABAergic input from amacrine cells. (B) Linear (LI) and non-linear (NLI) current components for the recordings shown in (A).

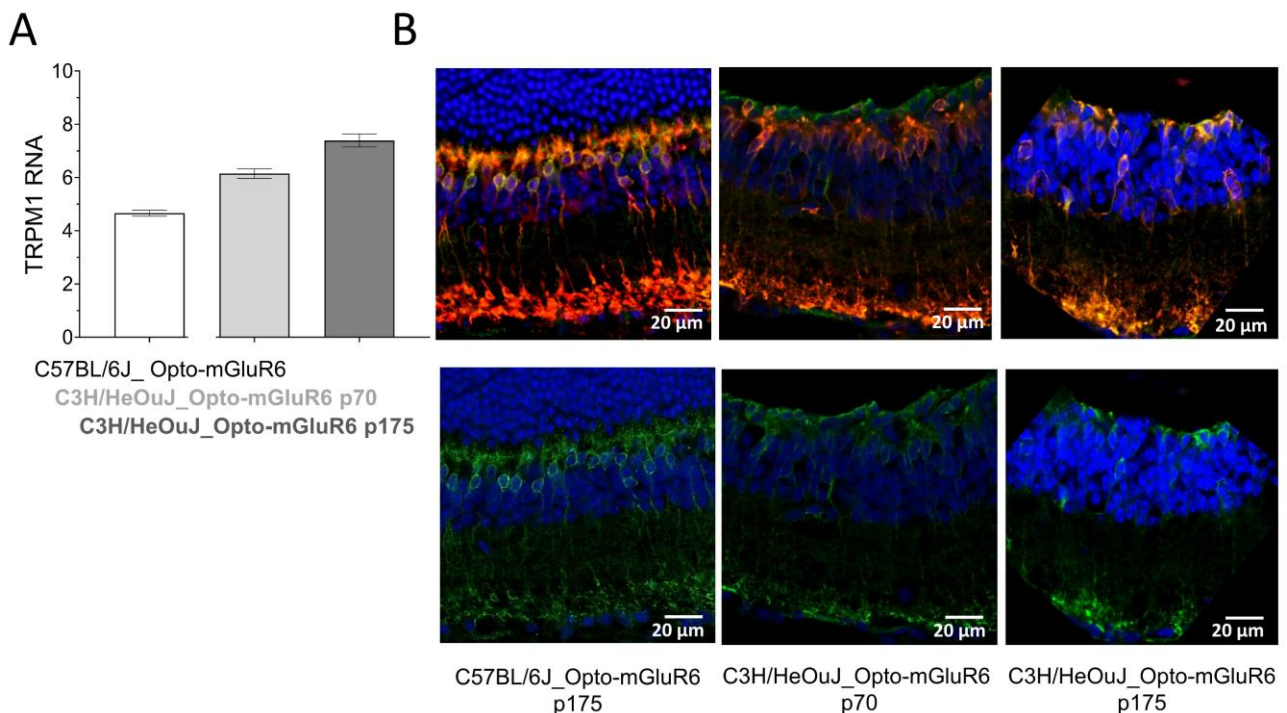

**FIGURE S4 | TRPM1 channel RNA levels and protein immunolocalization on RBCs in healthy and degenerated retina.** (A) TRPM1 RNA in *C57BL/6J\_Opto-mGluR6* mice (p175) and in *C3H/HeOuJ\_Opto-mGluR6* mice (p70) and (p175). (B) TRPM1 immunolabeling on retinal cryosection of *C57BL/6J\_Opto-mGluR6* (p175) mouse retina (left), *C3H/HeOuJ\_Opto-mGluR6* mouse retina at p70 (middle) and at p175 (right). TRPM1 re-localizes from the dendrites to the somata of RBCs in the degenerating retina. Green: anti-TRPM1, red: anti-PKCα (RBCs). Antibodies: rat polyclonal antibody against TRPM1 (1:100, BiCell Cat#11021, RRID: AB\_2895222), mouse monoclonal protein kinase Cα (1:750, Invitrogen Cat#sc8393, RRID: AB\_628142), rat monoclonal antibody Alexa 488 (1:400, Invitrogen Cat#A-11006, RRID: AB\_2534074), mouse polyclonal CY3 (1:400, Invitrogen Cat#A10521, RRID: AB\_2534030). Images were taken as single optical sections (770 nm) on a Zeiss LSM880 confocal microscope with a (63x, NA 1.4) objective.

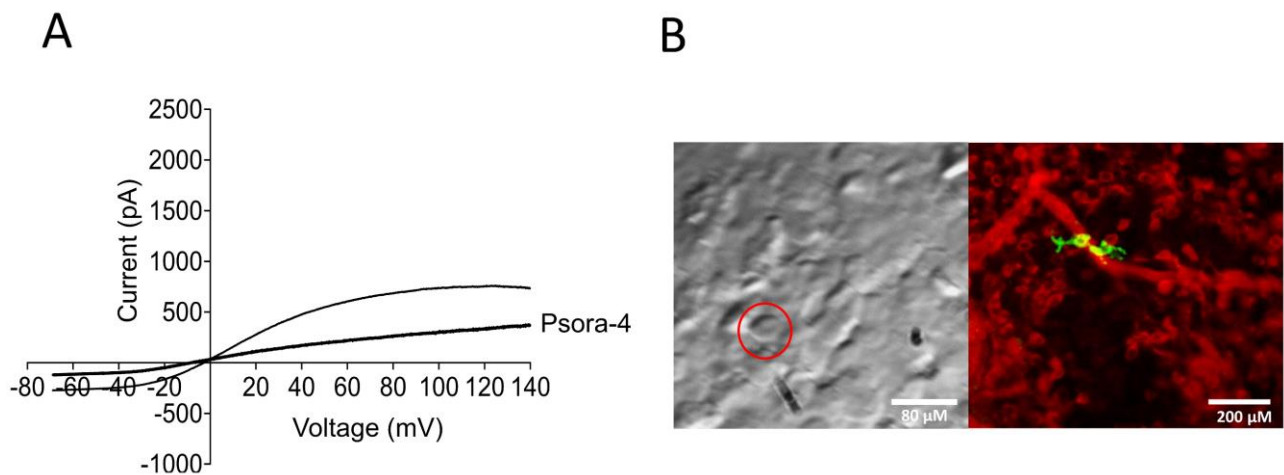

**FIGURE S5 | Kv1.3 is the prominent current in type 1 “belly-shaped” RBCs of *FVB/NCrl\_OptomGluR6* retinas.** (A) I/V relationship for type 1 responses recorded from RBCs in control condition (n=6) and with Psora-4 (100nM, n=6), a specific antagonist of Kv1.3 channels. (B) top: live image of a RBC during the electrophysiological recording the image was taken with infrared camera GP-CAM3 Altair Astro at Nikon Eclipse E600FN (40 x, NA 0.80); bottom: photomicrograph (3μM) of an injected and immunohistochemically labelled RBC (green) as one of the TurboFP635 expressing OBCs viewed on a Zeiss Axio Vert.A1 epifluorescence microscope (40 x, NA: 0,6).
